# Supplementary material
Source: publisher figshare collection journal article supplement (https://karger.figshare.com/articles/dataset/_/3840771)
Supplement: Supplementary file 1 [file 1]

## Supplementary Material

**Supplementary Figure 1.** Histological examination (hematoxylin and eosin staining) of BSA-treated LLC-implanted hepatic tumor model after latex angiography. (A) The central portion of the tumor after latex arteriography revealed multiple dilated vessels containing blue latex particles (arrows) and a few red blood cells (black arrowhead), (magnification  $\times 200$ ). (B) The peripheral portion (magnification  $\times 100$ ) and (C) central portion of tumor after latex portography (magnification  $\times 200$ ). Markedly dilated vessels containing blue latex particles (black arrows) were frequently noted at the tumor periphery near the liver/tumor junction (white arrowheads), while the vessels in the central portion of the tumor seemed to lack blue latex particles. Black arrowheads indicate red blood cells.

**Supplementary Figure 2.** Latex arteriography of LLC-implanted mice after BSA-treatment. (A) Gross specimen image and (B) sectioned specimen image after tissue clearance procedure. The transparent specimen showed an enlarged tumor feeding artery (red arrow) supplying a hypervascular mass (arrows).

**Supplementary Figure 3.** Latex arteriography of LLC-implanted mice after VEGF-Trap treatment.

(A) Images obtained before (left) and after (right) latex arteriography was performed. (B) Gross specimen image (left) and magnified specimen image (right) after the tissue-clearance procedure. The magnified area is indicated with dotted lines in the inset. (C) Sectioned specimen images.
